# Supplementary material for: Polydopamine-coated UiO-66 nanoparticles loaded with perfluorotributylamine/tirapazamine for hypoxia-activated osteosarcoma therapy
Source: PubMed Central journal article supplement (PMC8482624; doi:10.1186/s12951-021-01013-0), 2021-09-30

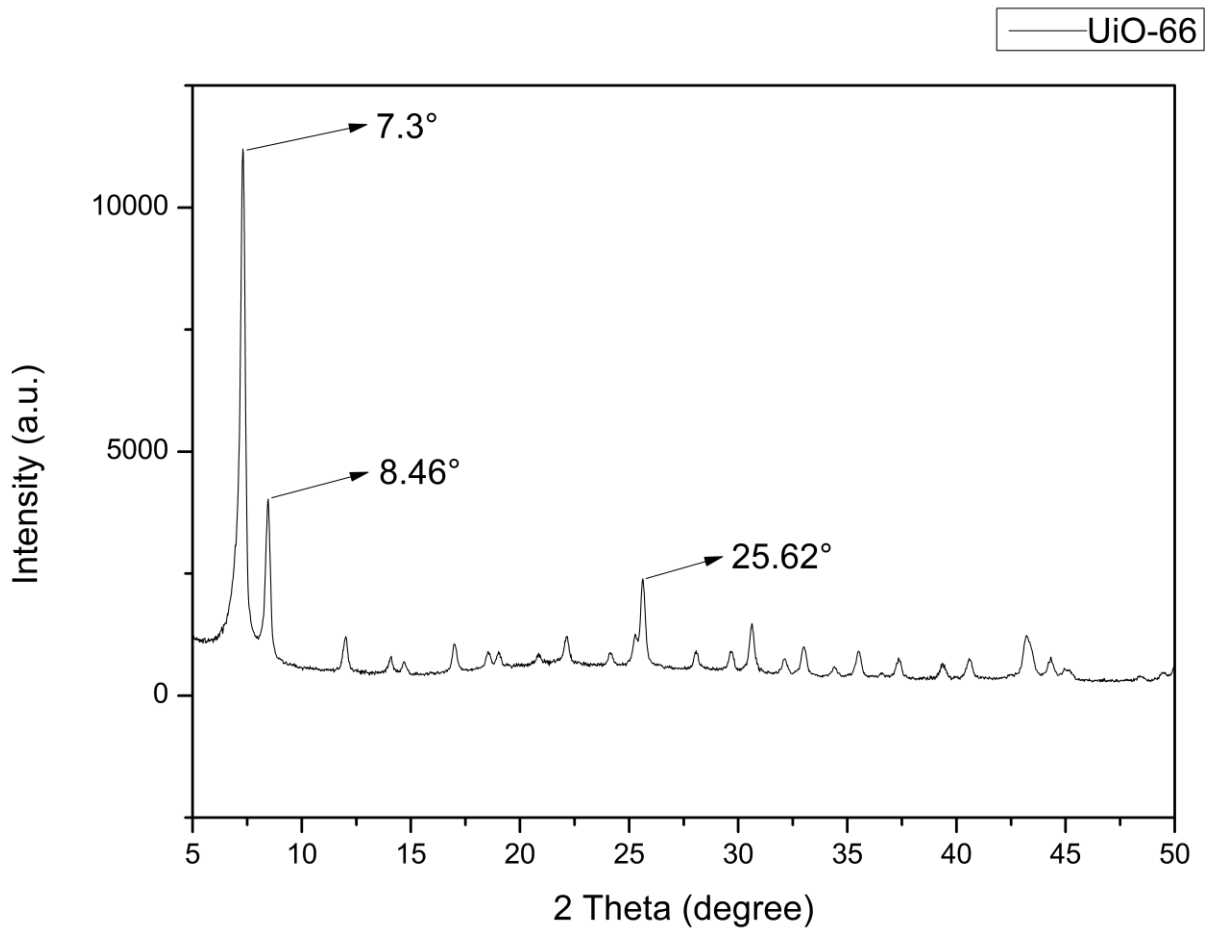

Supplement: 12951_2021_1013_MOESM2_ESM.pdf [file 12951_2021_1013_MOESM2_ESM.pdf]
